# Supplementary material for: Alterations of Lipid Profile in Livers with Impaired Lipophagy
Source: MDPI journal article supplement (doi:10.3390/ijms231911863), 2022-10-06
Supplement: s1 [file s1]

## **Alterations of lipid profile in livers with impaired lipophagy**

Wenke Jonas<sup>1,2</sup>, Kristin Schwerbel<sup>1,2</sup>, Lisa Zellner<sup>1,2</sup>, Markus Jähnert<sup>1,2</sup>, Pascal Gottmann<sup>1,2</sup>,  
and Annette Schürmann<sup>1,2,3</sup>

<sup>1</sup>Department of Experimental Diabetology, German Institute of Human Nutrition Potsdam-Rehbruecke, 14558 Nuthetal, Germany;

<sup>2</sup>German Center for Diabetes Research, 85764 München-Neuherberg, Germany;

<sup>3</sup>University of Potsdam, Institute of Nutritional Sciences, 14558 Nuthetal, Germany

## Supplementary results

**Table S1:** Fatty acid composition of total lipids in liver tissue of mice with reduced lipophagy ( $\Delta$ IRG) compared to control mice (IRG). Data are shown as means  $\pm$  SD and analyzed by unpaired *t*-test with Welch's correction. Significant values ( $p < 0.05$ ) are bold. IRG,  $n = 7$ ;  $\Delta$ IRG,  $n = 7$

| Fatty acid | (nmol/mg)          |                                       |
|------------|--------------------|---------------------------------------|
|            | IRG                | $\Delta$ IRG                          |
| C12:0      | 0.171 $\pm$ 0.068  | 0.217 $\pm$ 0.106                     |
| C14:0      | 0.900 $\pm$ 0.295  | <b>1.486 <math>\pm</math> 0.483</b>   |
| C14:1n-5   | 0.127 $\pm$ 0.045  | 0.213 $\pm$ 0.154                     |
| C15:0      | 0.216 $\pm$ 0.066  | <b>0.378 <math>\pm</math> 0.111</b>   |
| C16:0      | 43.716 $\pm$ 4.897 | <b>63.209 <math>\pm</math> 9.039</b>  |
| C16:1n-7   | 3.419 $\pm$ 0.865  | <b>6.670 <math>\pm</math> 1.883</b>   |
| C17:0      | 0.345 $\pm$ 0.091  | <b>0.644 <math>\pm</math> 0.116</b>   |
| C18:0      | 15.574 $\pm$ 1.585 | <b>18.435 <math>\pm</math> 1.934</b>  |
| C18:1n-9   | 33.127 $\pm$ 7.355 | <b>64.327 <math>\pm</math> 11.816</b> |
| C18:2n-6   | 31.466 $\pm$ 4.725 | <b>58.269 <math>\pm</math> 11.517</b> |
| C18:3n-3   | 2.593 $\pm$ 0.437  | <b>5.393 <math>\pm</math> 1.311</b>   |
| C18:4n-3   | 0.001 $\pm$ 0.000  | 0.001 $\pm$ 0.000                     |
| C20:0      | 0.713 $\pm$ 0.091  | <b>1.882 <math>\pm</math> 0.366</b>   |
| C20:1n-9   | 0.724 $\pm$ 0.234  | <b>2.663 <math>\pm</math> 0.643</b>   |
| C20:2      | 0.555 $\pm$ 0.125  | <b>1.606 <math>\pm</math> 0.314</b>   |
| C20:3n-6   | 1.669 $\pm$ 0.359  | <b>3.220 <math>\pm</math> 0.678</b>   |
| C20:4n-6   | 14.769 $\pm$ 1.420 | 15.093 $\pm$ 2.240                    |
| C20:5n-3   | 0.658 $\pm$ 0.063  | <b>0.892 <math>\pm</math> 0.224</b>   |
| C22:0      | 0.917 $\pm$ 0.139  | 0.848 $\pm$ 0.116                     |
| C22:1n-9   | 0.156 $\pm$ 0.016  | <b>0.217 <math>\pm</math> 0.031</b>   |
| C22:2n-6   | 0.002 $\pm$ 0.001  | 0.003 $\pm$ 0.001                     |
| C22:4n-6   | 0.556 $\pm$ 0.044  | <b>0.900 <math>\pm</math> 0.208</b>   |
| C22:5n-3   | 1.481 $\pm$ 0.120  | <b>2.173 <math>\pm</math> 0.618</b>   |
| C22:6n-3   | 15.543 $\pm$ 1.562 | 16.021 $\pm$ 2.228                    |
| C24:0      | 0.247 $\pm$ 0.054  | 0.216 $\pm$ 0.041                     |
| C24:1n-9   | 0.255 $\pm$ 0.041  | 0.217 $\pm$ 0.045                     |
| C26:0      | 0.003 $\pm$ 0.000  | 0.003 $\pm$ 0.000                     |

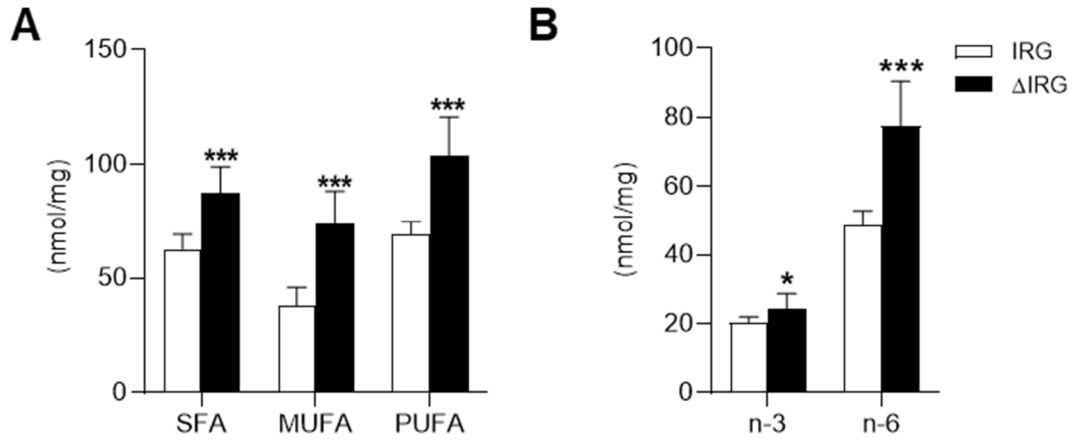

**Figure S1.** Hepatic lipid content of in total lipids of IRG and  $\Delta$ IRG mice. **(A)** Concentration of saturated (SFA), monounsaturated (MUFA) and polyunsaturated (PUFA) fatty acids levels. **(B)** Concentration of total fatty acids in n-3 and n-6 series. Data are shown as means  $\pm$  SD and analyzed by unpaired *t*-test with Welch's correction. \*  $p < 0.05$ ; \*\*\*  $p < 0.001$ ; IRG,  $n = 7$ ;  $\Delta$ IRG,  $n = 7$

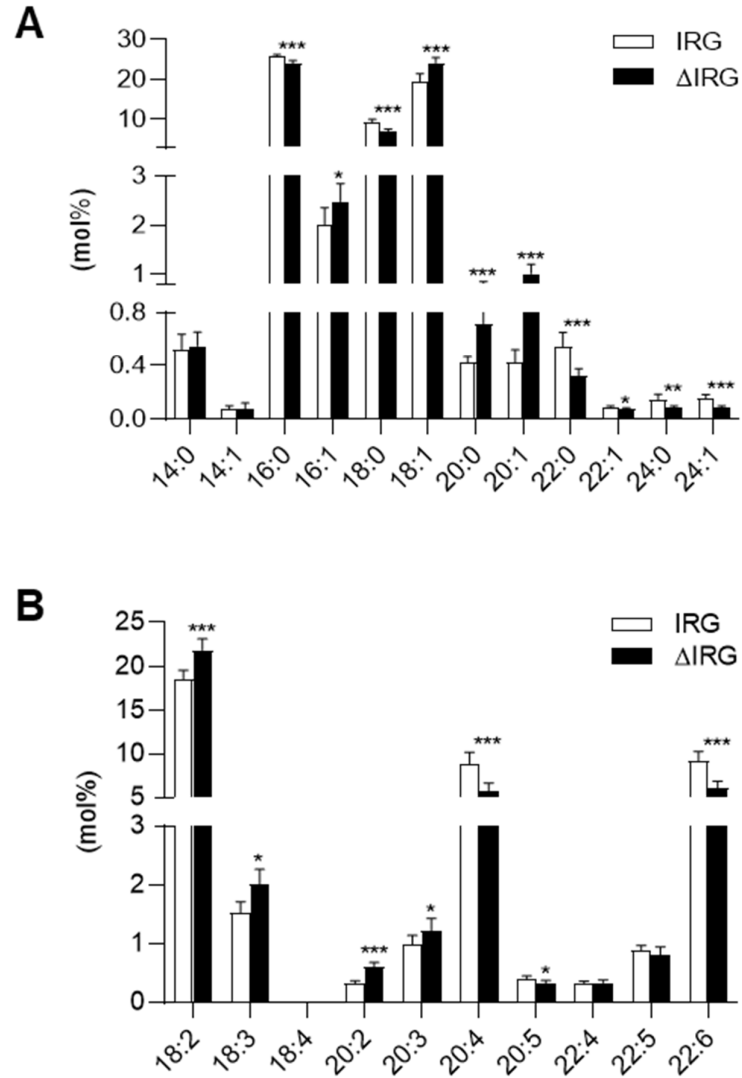

**Figure S2.** Relative abundance of individual lipid species in total lipids. **(A)** Saturated and monounsaturated fatty acids as well as **(B)** polyunsaturated fatty acids in liver samples of  $\Delta$ IRG mice compared to IRG mice. Data are shown as means  $\pm$  SD and analyzed by unpaired *t*-test. \*  $p < 0.05$ ; \*\*  $p < 0.01$ ; \*\*\*  $p < 0.001$ ; IRG,  $n = 7$ ;  $\Delta$ IRG,  $n = 7$

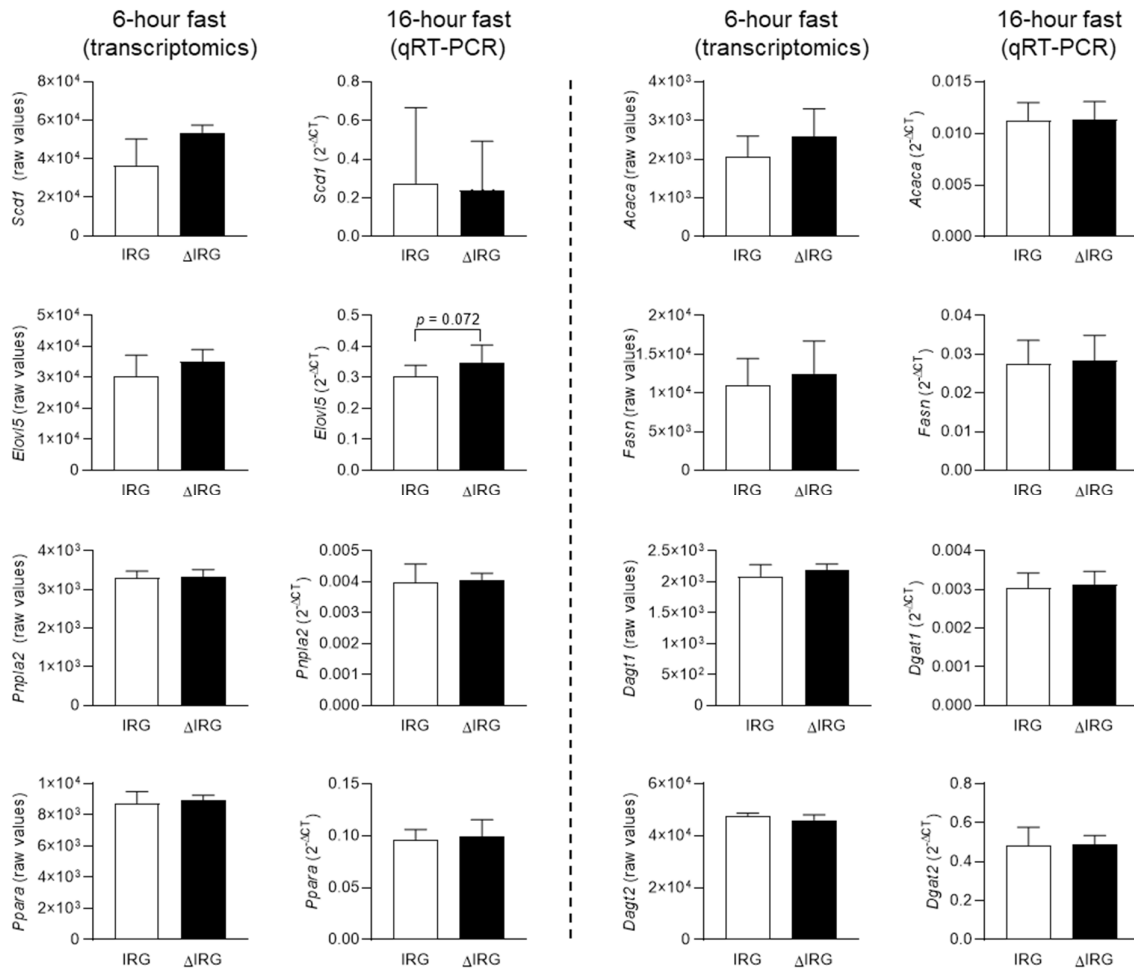

**Figure S3.** Hepatic expression of genes related to lipid metabolism. Mice were sacrificed after a 6- or 16-hours period of fasting. Gene expression was analyzed by transcriptomics or qRT-PCR, respectively. Data are shown as means  $\pm$  SD and analyzed by unpaired  $t$ -test with Welch's correction. 6-hours: IRG,  $n = 4$ ;  $\Delta$ IRG,  $n = 4$ ; 16-hours: IRG,  $n = 8$ ;  $\Delta$ IRG,  $n = 7$ .

## Supplemental material

**Table S2:** List of assays used for qRT-PCR

| Gene          | Description                                      | Assay-ID              | Company                           |
|---------------|--------------------------------------------------|-----------------------|-----------------------------------|
| <i>Acaca</i>  | Acetyl-CoA carboxylase alpha                     | Mm.PT.58.12492865     | Integrated DNA Technologies (IDT) |
| <i>Dgat1</i>  | Diacylglycerol O-acyltransferase 1               | Mm00515643_m1         | Thermo Fisher                     |
| <i>Dgat2</i>  | Diacylglycerol O-acyltransferase 2               | Mm00499530_m1         | Thermo Fisher                     |
| <i>Eef2</i>   | Eukaryotic translation elongation factor         | <i>Self designed*</i> | IDT                               |
| <i>Elovl5</i> | ELOVL fatty acid elongase 5                      | Mm.PT.58.43010575     | IDT                               |
| <i>Fasn</i>   | Fatty acid synthase                              | Mm.PT.58.31183175     | IDT                               |
| <i>Hprt</i>   | Hypoxanthine guanine phosphoribosyl transferase  | Mm.PT.39a.22214828    | IDT                               |
| <i>Ifgga2</i> | Immunity-related GTPase                          | Mm01621208_s1         | Thermo Fisher                     |
| <i>Ppia</i>   | Peptidylpropyl isomerase A                       | Mm.PT.39a.2.gs        | IDT                               |
| <i>Pnpla2</i> | Patatin like phospholipase domain containing 2   | Mm00503040_m1         | Thermo Fisher                     |
| <i>Ppara</i>  | Peroxisome proliferator activated receptor alpha | Mm00440939_m1         | Thermo Fisher                     |
| <i>Scd1</i>   | Stearoyl-Coenzyme A desaturase 1                 | Mm.PT:58.43504385     | IDT                               |

\* Probe: 5'-TAAGCAGAGZENCAAGGATGGCT-3'

Primer1: 5'-TGAGGTTGATGAGGAAGCCC-3'

Primer2: 5'-CACAATCAAATCCACCGCCA-3'
